# Supplementary material
Source: Springer Nature journal article supplement (https://www.springermedizin.de/resource/supplementary/12911_2012_770_MOESM5_ESM.pdf/9526286)

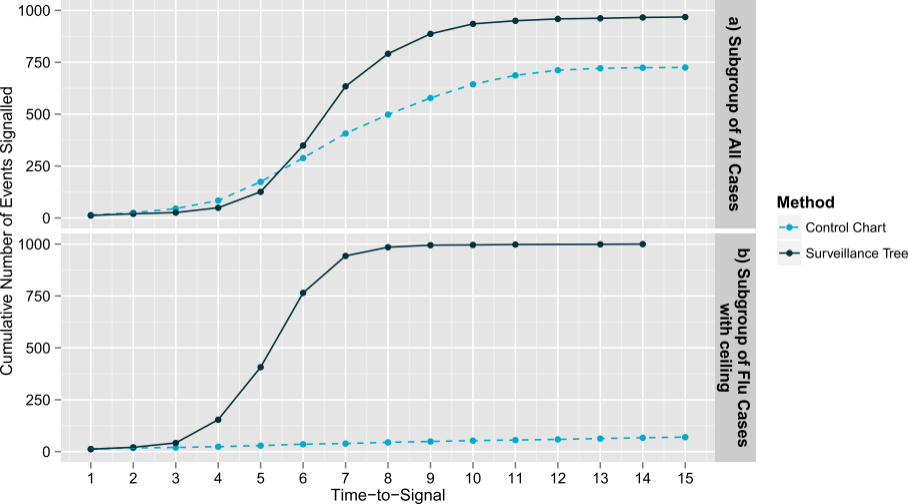

Supplement: MOESM5 [file 9526286]
